# Supplementary material for: The foot core system: a new paradigm for understanding intrinsic foot muscle function
Source: HighWire-hosted journal article supplement (doi:10.1136/bjsports-2013-092690), 2014-03-21
Supplement: bjsports-2013-092690supp_appendix.pdf [file bjsports-2013-092690supp_appendix.pdf]

Appendix: Layers of the Plantar and Dorsal Intrinsic Foot Muscles. The muscles are numbered in reference to the labeled muscles in figure 6.

| Muscle                                | Origin                                                                             | Insertion                                                                                        | Action                                                                              |
|---------------------------------------|------------------------------------------------------------------------------------|--------------------------------------------------------------------------------------------------|-------------------------------------------------------------------------------------|
| Plantar Intrinsic Foot Muscle Layer 1 |                                                                                    |                                                                                                  |                                                                                     |
| 1. Abductor Hallucis                  | Medial process of calcaneal tuberosity, plantar aponeurosis, Flexor retinaculum    | Medial base of 1 <sup>st</sup> proximal phalanx.                                                 | Abduction and flexion of 1 <sup>st</sup> metatarsophalangeal joint.                 |
| 2. Flexor Digitorum Brevis            | Medial process of calcaneal tuberosity, plantar aponeurosis, intermuscular septum  | Medial and lateral aspects of the middle phalangees of toes 2-5.                                 | Flexion of the metatarsophalangeal and proximal interphalangeal joints of toes 2-5. |
| 3. Abductor Digiti Minimi             | Lateral process of calcaneal tuberosity, plantar aponeurosis, intermuscular septum | Lateral base of the 5 <sup>th</sup> proximal phalanx.                                            | Abduction and flexion of 5 <sup>th</sup> metatarsophalangeal joint.                 |
| Plantar Intrinsic Foot Muscle Layer 2 |                                                                                    |                                                                                                  |                                                                                     |
| 4. Quadratus Plantae                  | Medial to lateral plantar surface of calcaneus                                     | Tendon of the FDL                                                                                | Modifies pull of FDLT and assists with flexion of 2-5 toes.                         |
| 5. Lumbricals                         | FDL tendons                                                                        | Medial aspect of proximal phalanx and dorsal expansion of extensor digitorum longus tendons 2-5. | Flex metatarsophalangeal joints and extend digits of toes 2-5.                      |
| Plantar Intrinsic Foot Muscle Layer 3 |                                                                                    |                                                                                                  |                                                                                     |
| 6. Flexor Digiti Minimi Brevis        | Base of the 5 <sup>th</sup> metatarsal                                             | Base of the 5 <sup>th</sup> proximal phalanx                                                     | Flexion of the 5 <sup>th</sup> metatarsophalangeal joint                            |
| 7a. Adductor Hallucis Oblique Head    | Base of metatarsals 2-4                                                            | Lateral base of the great toe proximal phalanx                                                   | Adduct 1 <sup>st</sup> digit and support transverse arch                            |
| 7b. Adductor Hallucis Transverse Head | Plantar ligaments of the metatarsophalangeal joints 3-5.                           |                                                                                                  |                                                                                     |
| 8. Flexor Hallucis Brevis             | Plantar surface of cuboid and lateral cuneiforms                                   | Medial and lateral aspects of the great toe proximal phalanx                                     | Flexion of the great toe metatarsophalangeal joint                                  |
| Plantar Intrinsic Foot Muscle Layer 4 |                                                                                    |                                                                                                  |                                                                                     |
| 9. Plantar Interossei                 | Medial aspect of the base of metatarsals 3-5                                       | Medial aspect of the base of the proximal phalanges 3-5                                          | Adduction of toes and flexion of metatarsophalangeal joints                         |
| Dorsal Intrinsic Foot Muscles         |                                                                                    |                                                                                                  |                                                                                     |
| 10. Dorsal Interossei                 | Adjacent sides of metatarsals 1-5                                                  | Medial aspect of 2 <sup>nd</sup> proximal phalanx and lateral aspect of proximal phalanges 2-4   | Abduction of toes and flexion of metatarsophalangeal joints                         |
| 11. Extensor Digitorum Brevis         | Distal aspect of the superior and lateral calcaneus                                | Extensor Hallucis and Digitorum Longus Tendons for Toes 1-4                                      | Extend the metatarsophalangeal joints of toes 1-4                                   |
